# Supplementary material
Source: Springer Nature journal article supplement (https://www.springermedizin.de/resource/supplementary/12981_2006_43_MOESM2_ESM.pdf/9603702)

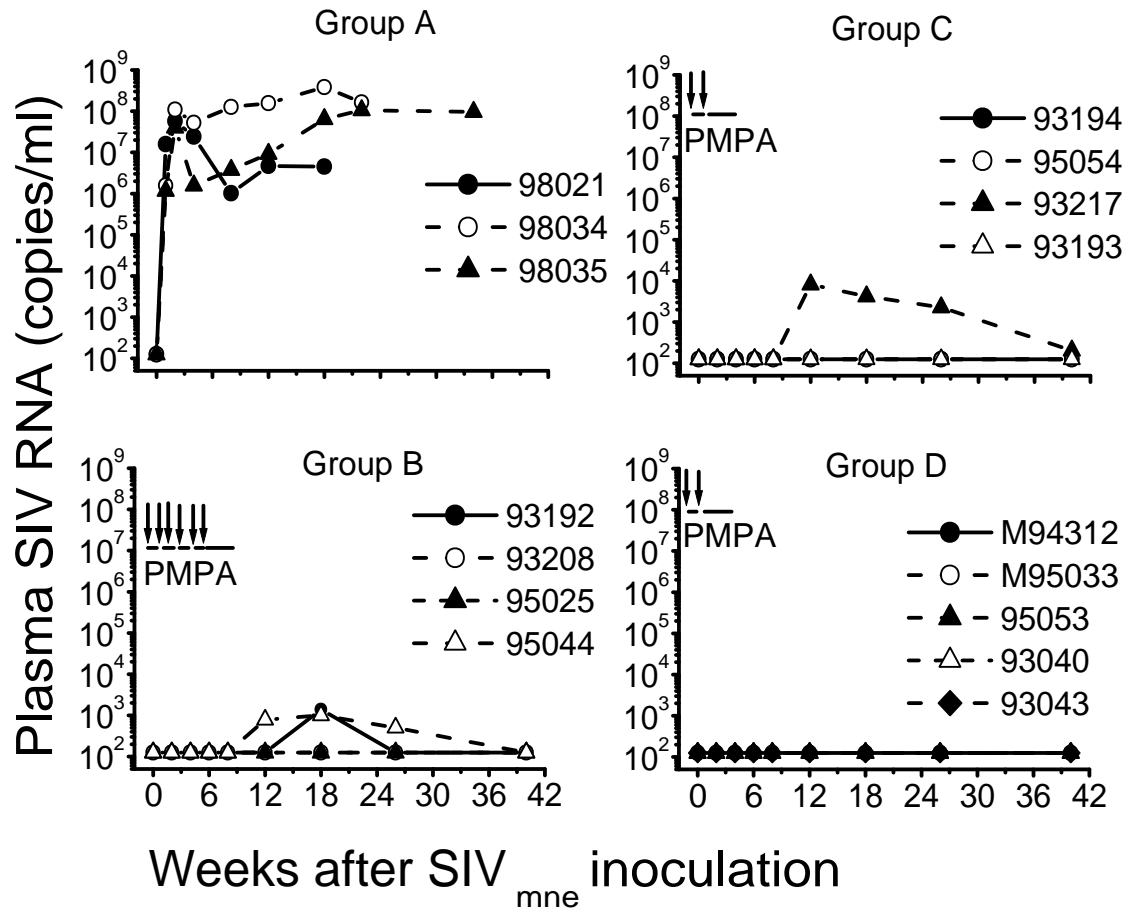

Supplement: MOESM2 [file 9603702]
